# Supplementary material for: Inhibition of Vascular Endothelial Cadherin Cleavage Prevents Elastic Fiber Alterations and Atherosclerosis Induced by Intermittent Hypoxia in the Mouse Aorta
Source: MDPI journal article supplement (doi:10.3390/ijms23137012), 2022-06-24
Supplement: s1 [file s1]

Supplementary Materials:

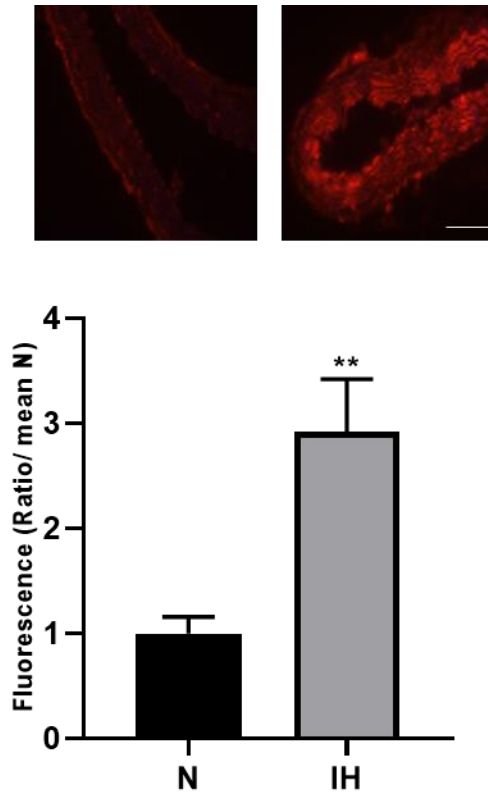

**Supplementary data S1. The effect of IH was checked by measuring HIF-1 expression by immunofluorescence on aorta cryosections.** Intermittent hypoxia activates HIF-1 in the aortic wall of C57BL/6J mice after 14 days of exposure to IH (N vs IH,  $p=0.006$ , Welch t-test,  $n=8$ ). Values are mean + SEM. Cryosections of 10 $\mu$ m were fixed in 4% paraformaldehyde for 15 minutes at room temperature. Cryosections were incubated overnight with a rabbit anti-mouse HIF1 $\alpha$  diluted at 1:500 (Reference Ab2185, Abcam, Cambridge, United Kingdom), then with Alexa Fluor 546 anti-rabbit secondary antibody diluted at 1:500 (reference A-11035, Thermo Scientific, Waltham, USA). Scale bar, 50 $\mu$ m. \*\*  $p\leq 0.0$ .

| Administration route | group          | n | Weight day0 | p-value | Weight day14 | p-value | Hematocrit day14 | p-value |
|----------------------|----------------|---|-------------|---------|--------------|---------|------------------|---------|
| Gavage               | N              | 8 | 26,48±1,06  | 0,989   | 27,72±1,03   | <0,001  | 42,5±2           | 0,001   |
|                      | IH             | 7 | 26±1,11     |         | 25,45±1,01   |         | 48,85±3,07       |         |
|                      | N+Pazopanib    | 7 | 26,78±1,96  | 0,985   | 27,3±0,86    | <0,001  | 44,42±2,99       | 0,03    |
|                      | IH+Pazopanib   | 8 | 26,26±2,09  |         | 23,96±1,78   |         | 48,37±2,38       |         |
|                      | N+Saracatinib  | 6 | 26,75±0,94  | 0,878   | 27,61±0,43   | <0,001  | 45,83±2,64       | 0,008   |
|                      | IH+Saracatinib | 5 | 27,78±1,57  |         | 24,72±1,27   |         | 52,5±1,29        |         |
| IP                   | N              | 8 | 25,07±2,13  | 0,992   | 26,41±1,9    | 0,004   | 44,5±1,19        | 0,006   |
|                      | IH             | 8 | 25,3±1,03   |         | 23,83±1,03   |         | 49±4,14          |         |
|                      | N+ACF          | 7 | 24,48±1,72  | 0,788   | 25,84±0,98   | 0,001   | 45,28±1,25       | 0,002   |
|                      | IH+ACF         | 8 | 25,28±1,67  |         | 22,82±1,29   |         | 51,37±2,55       |         |

**Supplementary data S2:** Weight and hematocrit of C57BL/6J mice used for the vascular remodeling experiment.

| Administration route | group          | n | Weight day0 | p-value | Weight day56 | p-value | Hematocrit | p-value |
|----------------------|----------------|---|-------------|---------|--------------|---------|------------|---------|
| Gavage               | N              | 6 | 24,65±1,55  | 0,742   | 25,4±1,46    | 0,135   | 45±0,81    | 0,04    |
|                      | IH             | 5 | 24,12±1,72  |         | 22,7±1       |         | 48,75±1,5  |         |
|                      | N+Pazopanib    | 6 | 26,38±1,36  | 0,821   | 25,95±1,03   | >0,999  | 44,83±2,13 | 0,05    |
|                      | IH+Pazopanib   | 6 | 26,63±1,4   |         | 25,11±1,7    |         | 48,83±3,25 |         |
|                      | N+Saracatinib  | 6 | 24,93±0,64  | 0,47    | 24,61±0,47   | >0,999  | 45,2±0,83  | 0,003   |
|                      | IH+Saracatinib | 6 | 25,51±1,21  |         | 23,13±0,73   |         | 50,66±2,33 |         |
| IP                   | N              | 6 | 24,95±2,28  | 0,956   | 26,41±2,52   | >0,999  | 47,50±2,88 | 0,73    |
|                      | IH             | 5 | 24,56±1,2   |         | 24,38±0,98   |         | 48,25±2,21 |         |
|                      | N+ACF          | 7 | 24,58±1,33  | 0,337   | 24,98±1,79   | 0,363   | 45,14±2,96 | 0,11    |
|                      | IH+ACF         | 8 | 23,62±1,58  |         | 23,2±1,06    |         | 47,37±2,82 |         |

**Supplementary data S3.** Weight and hematocrit of ApoE<sup>-/-</sup> mice used for the atherosclerotic lesion experiments.

| Administration route | group            | n | Mean $\pm$ SD (mmol/L) | p-value |
|----------------------|------------------|---|------------------------|---------|
| Gavage               | N                | 6 | 10,62 $\pm$ 1,77       | 0,22    |
|                      | IH               | 3 | 9,03 $\pm$ 0,65        |         |
|                      | N+Pazopanib      | 5 | 12,49 $\pm$ 1,71       | 0,36    |
|                      | IH+Pazopanib     | 6 | 11,36 $\pm$ 0,99       |         |
|                      | N + Saracatinib  | 6 | 11,72 $\pm$ 1,89       | 0,22    |
|                      | IH + Saracatinib | 6 | 9,91 $\pm$ 3,16        |         |
| IP                   | N                | 6 | 9,02 $\pm$ 2,22        | 0,45    |
|                      | IH               | 4 | 9,97 $\pm$ 3,61        |         |
|                      | N+ACF            | 6 | 10,10 $\pm$ 1,46       | 0,33    |
|                      | IH + ACF         | 8 | 11,11 $\pm$ 2,86       |         |

**Supplementary data S4.** Total cholesterol in ApoE<sup>-/-</sup> mice (n=3 to 5 in some groups, because of a lack of plasma to perform the dosage, due to technical issues).

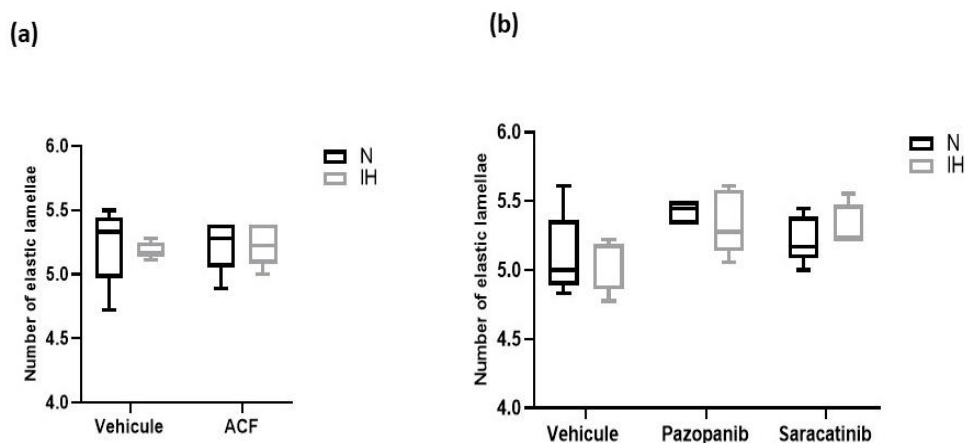

**Supplementary data S5.** In aortic cross-sections, the number of concentric elastic lamellae was counted. IH and the three inhibitors (acriflavin, saracatinib and pazopanib) had no effect on the number of elastic lamellae in the aorta of C57BL/6J mice. (a) Inhibiting HIF-1 (by ACF) had no effect on the number of elastic lamellae in the aorta of C57BL/6J mice (Kruskal-wallis test,  $p > 0.05$ ,  $n=5$ ). (b) Inhibiting VEGF receptor tyrosine kinases (by pazopanib) or src-kinases (by saracatinib) had no effect on the number of elastic lamellae in the aorta of C57BL/6J mice (Kruskal-wallis test,  $p > 0.05$ ,  $n=5$ ). N: normoxia, IH: intermittent hypoxia. Mice were exposed to N or IH for 14 days. Values are median + Interquartile range.
